# Supplementary material
Source: PubMed Central journal article supplement (PMC4624343)
Supplement: mmc1.pdf [file mmc1.pdf]

## Supplemental information

### Influence of Hydroxylation, Chain Length, and Chain Unsaturation on Bilayer Properties of Ceramides

Terhi Maula\*, Md. Abdullah Al Sazzad, J. Peter Slotte

Biochemistry, Faculty of Science and Engineering, Åbo Akademi University, 20520 Turku, Finland

\*Corresponding author

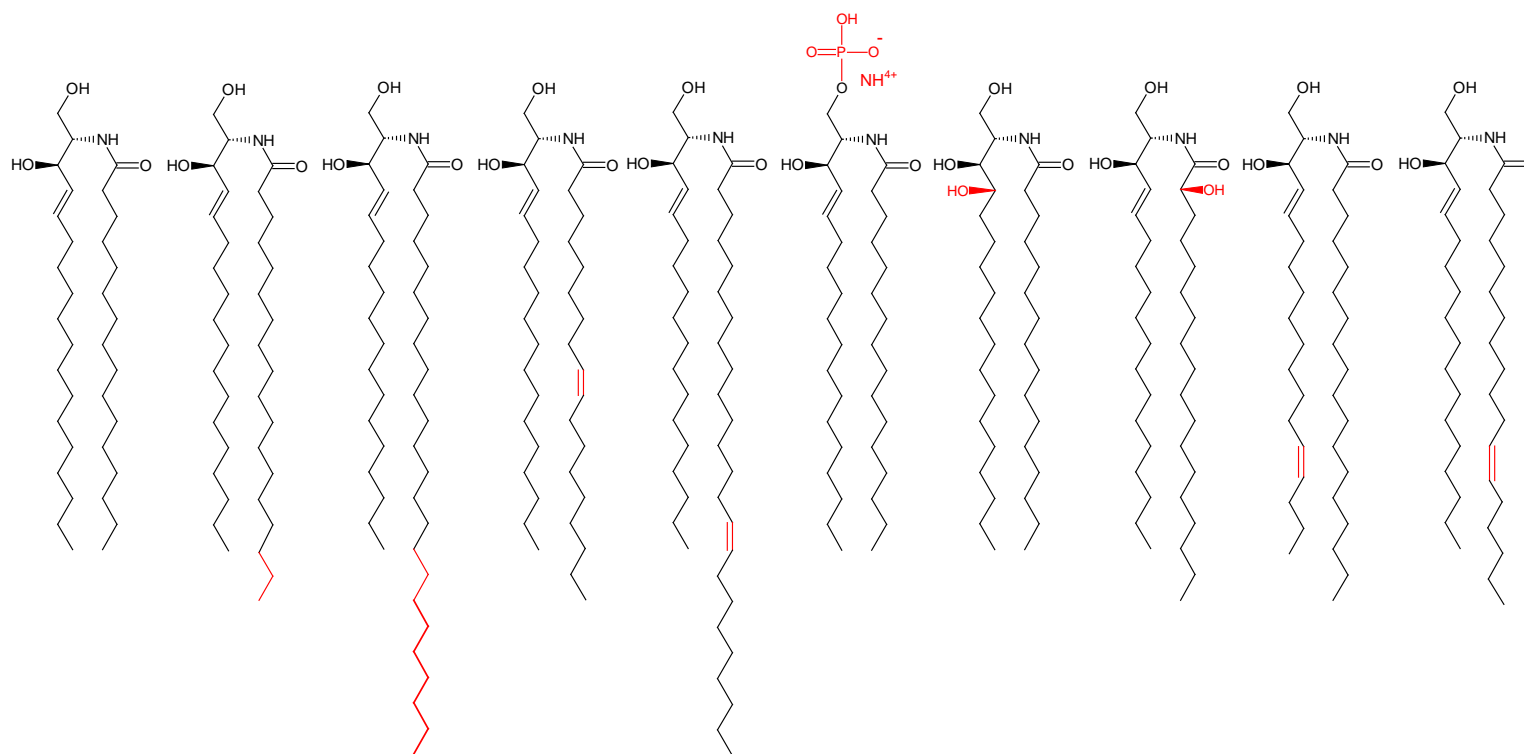

**Scheme S1.** Molecular structures of (from left to right) C16-cer, C18-cer, C24-cer, C18:1<sup>Δ9c</sup>-cer, C24:1<sup>Δ15c</sup>-cer, Cer-1-P, C16-phyto-cer, C18<sup>2OH</sup>-cer, C18-sphingadiene-cer and C18:1<sup>Δ12c</sup>-cer.

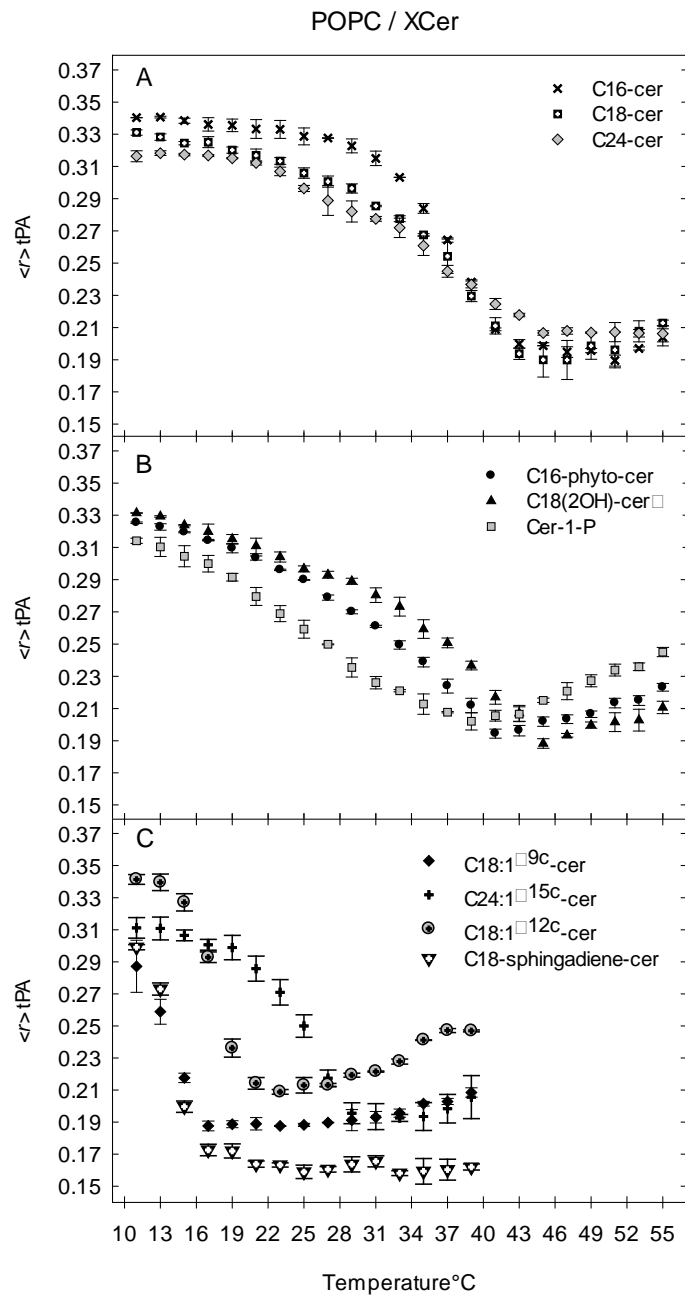

Figure S1. Steady-state fluorescence anisotropy of tPA (1 mol%) as a function of temperature in POPC/XCer bilayers (60:15 by mol). N=2-3  $\pm$  SD.

POPC / PSM / XCer

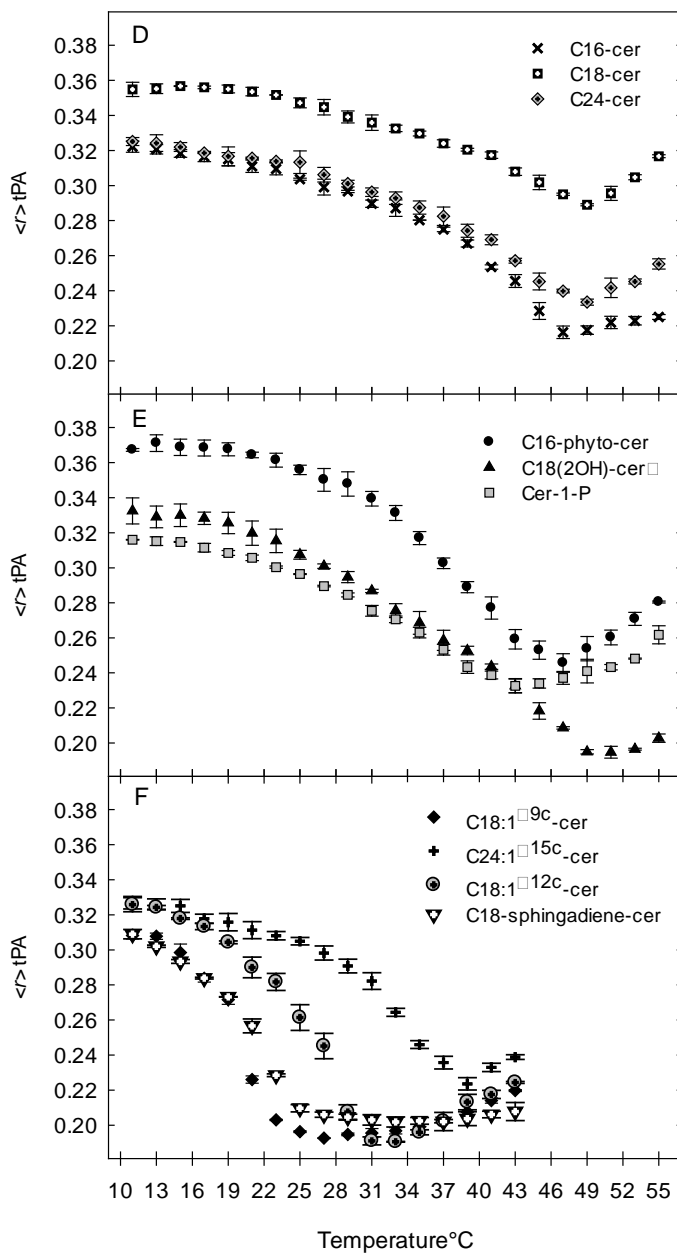

Figure S2. Steady-state fluorescence anisotropy of tPA (1 mol%) as a function of temperature in POPC/PSM/XCer bilayers (60:15:15 by mol). N=2-3  $\pm$  SD.

POPC / PSM / XCer / CHOL

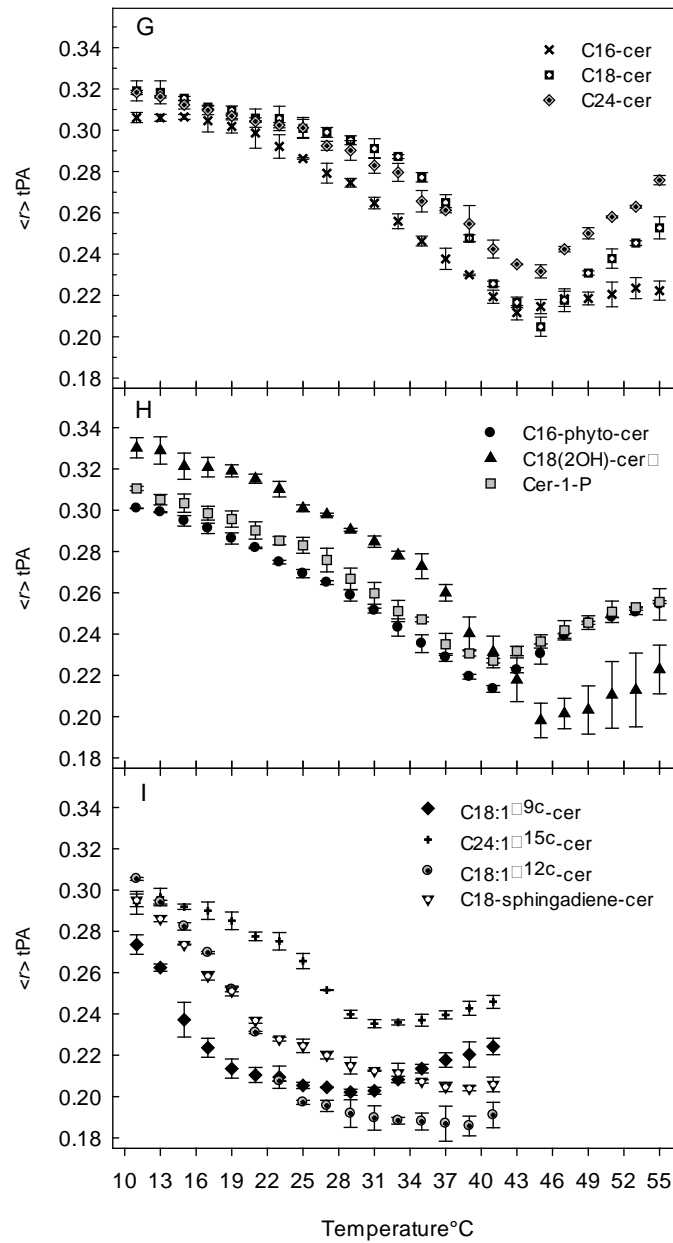

Figure S3. Steady-state fluorescence anisotropy of tPA (1 mol%) as a function of temperature in POPC/PSM/XCer/Chol bilayers (60:15:15:10 by mol). N=2-3  $\pm$  SD.

**Table S1.** Time-resolved fluorescence decays of tPA (1 mol%) in binary and ternary mixed bilayers at 23°C.

| Sample                              | $\tau_1$   | $f_1$      | $\alpha_1$ | $\tau_2$   | $f_2$      | $\alpha_2$ | $\tau_3$   | $f_3$       | $\alpha_3$  | $\tau_{AV}$ |
|-------------------------------------|------------|------------|------------|------------|------------|------------|------------|-------------|-------------|-------------|
| POPC/C16-cer                        | 49.1 ± 2.6 | 38.7 ± 3.1 | 14.8 ± 1.1 | 27.4 ± 0.7 | 45.0 ± 3.1 | 30.8 ± 2.1 | 5.6 ± 0.1  | 16.2 ± 1.4  | 54.2 ± 1.7  | 32.3 ± 1.9  |
| POPC/C18-cer                        | 49.0 ± 2.2 | 38.6 ± 3.0 | 14.6 ± 1.4 | 28.0 ± 1.1 | 45.0 ± 3.2 | 29.8 ± 2.1 | 5.4 ± 0.1  | 16.3 ± 0.8  | 55.4 ± 1.5  | 32.4 ± 2.4  |
| POPC/C24-cer                        | 48.2 ± 0.1 | 38.6 ± 1.3 | 15.7 ± 0.8 | 27.4 ± 0.1 | 46.8 ± 1.2 | 33.4 ± 0.3 | 5.6 ± 0.1  | 14.6 ± 0.1  | 50.9 ± 0.4  | 32.2 ± 0.3  |
| POPC/C16-phyto-cer                  | 42.0 ± 1.7 | 33.0 ± 1.5 | 7.5 ± 0.9  | 19.1 ± 1.7 | 18.2 ± 1.0 | 9.1 ± 0.4  | 5.5 ± 0.04 | 48.7 ± 2.5  | 83.3 ± 1.2  | 20.0 ± 0.4  |
| POPC/C18(2OH)-cer                   | 52.1 ± 3.7 | 43.5 ± 6.7 | 15.7 ± 2.3 | 29.7 ± 1.0 | 39.0 ± 6.3 | 24.6 ± 3.1 | 5.4 ± 0.04 | 17.3 ± 0.4  | 59.6 ± 1.7  | 35.4 ± 2.9  |
| POPC/Cer-1-P                        | 44.1 ± 2.5 | 39.3 ± 2.7 | 9.6 ± 1.5  | 19.6 ± 2.7 | 20.0 ± 2.4 | 11.0 ± 0.7 | 5.5 ± 0.05 | 40.6 ± 3.9  | 79.2 ± 2.3  | 23.5 ± 1.7  |
| POPC/C18:1 <sup>Δ9c</sup> -cer      | 8.5 ± 0.2  | 32.7 ± 2.3 | 23.5 ± 2.0 | 5.3 ± 0.1  | 67.2 ± 2.3 | 76.5 ± 2.0 |            |             |             | 6.3 ± 0.09  |
| POPC/C24:1 <sup>Δ15c</sup> -cer     | 37.8 ± 1.2 | 26.7 ± 3.2 | 8.1 ± 1.2  | 20.7 ± 1.0 | 40.0 ± 5.0 | 23.1 ± 3.4 |            |             |             | 20.1 ± 1.6  |
| POPC/C18:1 <sup>Δ12c</sup> -cer     | 10.7 ± 0.5 | 14.8 ± 2.6 | 8.7 ± 1.3  | 5.9 ± 0.1  | 85.2 ± 2.6 | 91.2 ± 1.4 |            |             |             | 6.6 ± 0.1   |
| POPC/C18-sphingadiene-cer           | 9.3 ± 0.4  | 25.1 ± 0.6 | 16.7 ± 0.8 | 5.5 ± 0.1  | 74.8 ± 0.6 | 83.2 ± 0.8 |            |             |             | 6.5 ± 0.1   |
| POPC/PSM/C16-cer                    | 52.5 ± 3.7 | 49.2 ± 2.6 | 16.7 ± 1.4 | 26.5 ± 1.5 | 31.1 ± 2.5 | 21.0 ± 2.6 | 5.6 ± 0.1  | 19.6 ± 2.9  | 62.2 ± 3.8  | 35.2 ± 3.4  |
| POPC/PSM/C18-cer                    | 49.3 ± 5.0 | 44.6 ± 3.8 | 18.0 ± 1.8 | 25.5 ± 1.9 | 40.9 ± 2.8 | 32.0 ± 2.3 | 5.6 ± 0.2  | 14.3 ± 1.7  | 49.9 ± 2.8  | 33.4 ± 4.3  |
| POPC/PSM/C24-cer                    | 48.0 ± 5.6 | 38.8 ± 8.9 | 17.4 ± 5.0 | 24.7 ± 1.7 | 49.0 ± 6.9 | 42.2 ± 5.6 | 6.2 ± 0.1  | 12.1 ± 3.5  | 40.3 ± 7.0  | 31.8 ± 5.8  |
| POPC/PSM/C16-phyto-cer              | 47.9 ± 1.1 | 41.0 ± 0.6 | 9.6 ± 0.7  | 20.8 ± 2.0 | 20.0 ± 3.2 | 10.8 ± 1.6 | 5.4 ± 0.1  | 38.9 ± 3.7  | 79.5 ± 2.4  | 26.0 ± 1.7  |
| POPC/PSM/C18(2OH)-cer               | 52.4 ± 6.5 | 47.9 ± 2.7 | 18.9 ± 1.7 | 27.6 ± 2.9 | 37.4 ± 1.9 | 28.1 ± 2.7 | 5.7 ± 0.2  | 14.6 ± 2.3  | 52.8 ± 4.1  | 36.3 ± 5.3  |
| POPC/PSM/Cer-1-P                    | 49.0 ± 2.5 | 43.5 ± 1.7 | 12.2 ± 1.4 | 22.8 ± 2.3 | 26.0 ± 3.0 | 15.6 ± 2.2 | 5.7 ± 0.1  | 30.3 ± 4.5  | 72.2 ± 3.6  | 29.1 ± 3.0  |
| POPC/PSM/C18:1 <sup>Δ9c</sup> -cer  | 34.9 ± 0.1 | 21.3 ± 0.5 | 5.5 ± 0.1  | 15.9 ± 0.4 | 25.6 ± 0.5 | 14.7 ± 0.1 | 6.0 ± 0.1  | 52.9 ± 1.0  | 79.7 ± 0.07 | 14.8 ± 0.2  |
| POPC/PSM/C24:1 <sup>Δ15c</sup> -cer | 39.3 ± 2.3 | 30.5 ± 5.6 | 10.7 ± 1.6 | 19.7 ± 2.4 | 47.7 ± 4.2 | 33.5 ± 1.8 | 5.4 ± 0.9  | 21.7 ± 1.7  | 55.7 ± 0.2  | 22.5 ± 0.8  |
| POPC/PSM/C18:1 <sup>Δ12c</sup> -cer | 38.1 ± 2.8 | 28.4 ± 8.1 | 8.6 ± 3.2  | 18.5 ± 2.4 | 38.0 ± 1.8 | 23.7 ± 4.9 | 5.5 ± 0.7  | 33.4 ± 9.6  | 67.6 ± 8.1  | 19.6 ± 1.0  |
| POPC/PSM/C18-sphingadiene-cer       | 37.1 ± 1.8 | 24.8 ± 7.1 | 6.7 ± 2.4  | 16.6 ± 2.3 | 31.0 ± 3.7 | 18.9 ± 5.7 | 5.7 ± 0.7  | 44.0 ± 10.8 | 74.3 ± 8.1  | 16.9 ± 1.1  |

The bilayer composition was 60/15 (by mol) and 60/15/15 (by mol) for the binary and ternary mixtures, respectively. Each value is the average of at least three independently repeated experiments (±SD).  $\tau$ , lifetime (ns);  $f$ , fractional intensity (%);  $\alpha$ , fractional amplitude (%);  $\tau_{AV}$ , intensity-weighted average lifetime (ns).

**Table S2. Time-resolved fluorescence decays of tPA (1 mol%) in binary and ternary mixed bilayers at 10°C.**

| Sample                                                  | $\tau_1$       | $f_1$          | $\alpha_1$     | $\tau_2$       | $f_2$          | $\alpha_2$     | $\tau_3$      | $f_3$          | $\alpha_3$     | $\tau_{AV}$    |
|---------------------------------------------------------|----------------|----------------|----------------|----------------|----------------|----------------|---------------|----------------|----------------|----------------|
| POPC/C18:1 <sup><math>\Delta^9</math></sup> -cer        | 50.3 $\pm$ 2.0 | 42.7 $\pm$ 3.5 | 21.5 $\pm$ 1.2 | 27.9 $\pm$ 1.8 | 44.0 $\pm$ 5.8 | 40.0 $\pm$ 5.8 | 8.7 $\pm$ 0.4 | 13.2 $\pm$ 2.5 | 38.4 $\pm$ 5.0 | 35.0 $\pm$ 1.7 |
| POPC/C24:1 <sup><math>\Delta^{15}</math></sup> -cer     | 51.7 $\pm$ 1.4 | 48.4 $\pm$ 5.7 | 25.5 $\pm$ 4.0 | 28.9 $\pm$ 1.6 | 40.0 $\pm$ 4.6 | 37.5 $\pm$ 2.1 | 8.4 $\pm$ 0.5 | 11.5 $\pm$ 1.2 | 36.9 $\pm$ 2.6 | 37.6 $\pm$ 1.9 |
| POPC/C18:1 <sup><math>\Delta^{12}</math></sup> -cer     | 53.1 $\pm$ 2.0 | 45.6 $\pm$ 4.2 | 24.8 $\pm$ 1.3 | 29.8 $\pm$ 2.1 | 44.9 $\pm$ 5.6 | 43.6 $\pm$ 5.6 | 8.7 $\pm$ 0.5 | 9.5 $\pm$ 1.4  | 31.4 $\pm$ 4.3 | 38.4 $\pm$ 1.2 |
| POPC/C18-sphingadiene-cer                               | 50.6 $\pm$ 1.7 | 47.6 $\pm$ 1.3 | 21.9 $\pm$ 1.9 | 25.0 $\pm$ 2.6 | 35.7 $\pm$ 3.4 | 33.4 $\pm$ 3.6 | 8.5 $\pm$ 0.4 | 16.5 $\pm$ 2.9 | 44.6 $\pm$ 5.1 | 34.5 $\pm$ 2.3 |
| POPC/PSM/C18:1 <sup><math>\Delta^9</math></sup> -cer    | 52.4 $\pm$ 1.2 | 43.0 $\pm$ 3.1 | 23.2 $\pm$ 1.5 | 29.0 $\pm$ 0.6 | 47.2 $\pm$ 3.3 | 46.0 $\pm$ 2.6 | 8.8 $\pm$ 0.3 | 9.6 $\pm$ 0.2  | 30.7 $\pm$ 1.2 | 37.2 $\pm$ 1.2 |
| POPC/PSM/C24:1 <sup><math>\Delta^{15}</math></sup> -cer | 53.1 $\pm$ 0.8 | 45.2 $\pm$ 3.0 | 23.5 $\pm$ 1.9 | 28.4 $\pm$ 0.8 | 44.1 $\pm$ 2.5 | 42.6 $\pm$ 1.3 | 8.6 $\pm$ 0.2 | 10.6 $\pm$ 0.4 | 33.8 $\pm$ 0.8 | 37.4 $\pm$ 0.1 |
| POPC/PSM/C18:1 <sup><math>\Delta^{12}</math></sup> -cer | 51.6 $\pm$ 2.4 | 50.0 $\pm$ 4.9 | 26.7 $\pm$ 1.1 | 27.2 $\pm$ 2.6 | 42.4 $\pm$ 4.2 | 43.1 $\pm$ 4.3 | 7.1 $\pm$ 2.8 | 7.5 $\pm$ 1.4  | 30.0 $\pm$ 3.1 | 37.9 $\pm$ 1.2 |
| POPC/PSM/C18-sphingadiene-cer                           | 52.4 $\pm$ 3.6 | 48.3 $\pm$ 7.7 | 25.8 $\pm$ 3.7 | 27.3 $\pm$ 4.0 | 43.9 $\pm$ 7.0 | 45.4 $\pm$ 8.3 | 7.8 $\pm$ 2.5 | 7.7 $\pm$ 3.1  | 28.6 $\pm$ 9.2 | 37.9 $\pm$ 2.2 |

The bilayer composition was 60/15 (by mol) and 60/15/15 (by mol) for the binary and ternary mixtures, respectively. Each value is the average of at least three independently repeated experiments ( $\pm$ SD).  $\tau$ , lifetime (ns);  $f$ , fractional intensity (%);  $\alpha$ , fractional amplitude (%);  $\tau_{AV}$ , intensity-weighted average lifetime (ns).

**Table S3.** Time-resolved fluorescence decays of tPA (1 mol%, 23 °C) in complex mixed bilayers containing cholesterol.

| Sample                                   | $\tau_1$   | $f_1$       | $\alpha_1$  | $\tau_2$   | $f_2$      | $\alpha_2$  | $\tau_3$  | $f_3$      | $\alpha_3$ | $\tau_{AV}$ |
|------------------------------------------|------------|-------------|-------------|------------|------------|-------------|-----------|------------|------------|-------------|
| POPC/PSM/C16-cer/CHOL                    | 50.3 ± 1.0 | 36.3 ± 9.5  | 10.7 ± 1.9  | 21.9 ± 3.7 | 31.1 ± 7.3 | 21.5 ± 4.4  | 7.3 ± 1.3 | 32.5 ± 2.4 | 67.6 ± 2.4 | 27.7 ± 2.4  |
| POPC/PSM/C18-cer/CHOL                    | 47.5 ± 2.8 | 35.8 ± 2.1  | 12.30 ± 0.7 | 22.3 ± 1.2 | 37.1 ± 2.8 | 27.29 ± 4.6 | 7.3 ± 0.7 | 27.0 ± 0.9 | 60.4 ± 5.2 | 27.3 ± 1.5  |
| POPC/PSM/C24-cer/CHOL                    | 44.1 ± 3.6 | 35.1 ± 4.26 | 13.3 ± 2.2  | 21.1 ± 2.8 | 42.5 ± 1.6 | 33.6 ± 2.3  | 7.0 ± 0.8 | 22.3 ± 3.3 | 53.0 ± 4.5 | 26.0 ± 1.4  |
| POPC/PSM/C16-phyto-cer/CHOL              | 43.8 ± 0.3 | 18.0 ± 6.3  | 4.2 ± 1.4   | 15.5 ± 0.7 | 36.5 ± 8.8 | 24.4 ± 6.6  | 6.5 ± 0.2 | 45.3 ± 2.5 | 71.3 ± 5.1 | 16.5 ± 1.8  |
| POPC/PSM/C18(2OH)-cer/CHOL               | 47.6 ± 2.5 | 40.6 ± 1.1  | 14.6 ± 1.6  | 22.4 ± 1.3 | 33.8 ± 4.9 | 26.0 ± 5.0  | 7.3 ± 0.4 | 25.5 ± 3.9 | 59.3 ± 6.6 | 28.8 ± 0.7  |
| POPC/PSM/Cer-1- P/CHOL                   | 50.0 ± 0.4 | 26.8 ± 4.8  | 6.9 ± 1.2   | 17.2 ± 0.3 | 35.8 ± 5.1 | 27.0 ± 3.9  | 7.4 ± 0.4 | 37.4 ± 0.6 | 65.9 ± 2.6 | 22.3 ± 1.2  |
| POPC/PSM/C18:1 <sup>Δ9c</sup> -cer/CHOL  | 12.7 ± 0.4 | 52.7 ± 2.0  | 37.6 ± 1.9  | 6.9 ± 0.2  | 47.3 ± 2.0 | 62.3 ± 1.9  |           |            |            | 9.9 ± 0.4   |
| POPC/PSM/C24:1 <sup>Δ15c</sup> -cer/CHOL | 39.1 ± 3.1 | 16.4 ± 4.2  | 5.4 ± 1.9   | 18.7 ± 0.8 | 47.4 ± 4.5 | 32.2 ± 0.6  | 7.4 ± 0.5 | 36.1 ± 0.3 | 62.2 ± 1.4 | 17.9 ± 0.1  |
| POPC/PSM/C18:1 <sup>Δ12c</sup> -cer/CHOL | 13.8 ± 0.8 | 43.7 ± 3.2  | 28.0 ± 2.9  | 6.9 ± 0.3  | 56.3 ± 3.3 | 72.0 ± 2.9  |           |            |            | 9.9 ± 0.5   |
| POPC/PSM/C18-sphingadiene-cer/CHOL       | 12.9 ± 0.6 | 48.4 ± 3.7  | 32.5 ± 3.6  | 6.6 ± 0.5  | 51.6 ± 3.7 | 67.5 ± 3.6  |           |            |            | 9.7 ± 0.7   |

The bilayer composition was 60/15/15/10 (by mol) for the quaternary mixtures. Each value is the average of at least three independently repeated experiments (±SD).  $\tau$ , lifetime (ns);  $f$ , fractional intensity (%);  $\alpha$ , fractional amplitude (%);  $\tau_{AV}$ , intensity-weighted average lifetime (ns).

**Table S4.** Time-resolved fluorescence decays of tPA (1 mol%, 10 °C) in complex mixed bilayers containing cholesterol.

| Sample                                   | $\tau_1$   | $f_1$      | $\alpha_1$ | $\tau_2$   | $f_2$      | $\alpha_2$ | $\tau_3$  | $f_3$      | $\alpha_3$  | $\tau_{AV}$ |
|------------------------------------------|------------|------------|------------|------------|------------|------------|-----------|------------|-------------|-------------|
| POPC/PSM/C18:1 <sup>Δ9c</sup> -cer/CHOL  | 48.5 ± 2.2 | 28.0 ± 0.5 | 13.7 ± 0.9 | 24.4 ± 1.7 | 60.1 ± 2.5 | 58.3 ± 4.3 | 6.5 ± 4.8 | 11.7 ± 2.4 | 27.9 ± 4.6  | 29.5 ± 1.5  |
| POPC/PSM/C24:1 <sup>Δ15c</sup> -cer/CHOL | 45.7 ± 3.5 | 45.0 ± 7.2 | 22.2 ± 3.0 | 21.5 ± 3.3 | 46.5 ± 5.0 | 48.7 ± 2.7 | 6.6 ± 2.3 | 8.5 ± 2.2  | 29.0 ± 0.3  | 31.1 ± 1.2  |
| POPC/PSM/C18:1 <sup>Δ12c</sup> -cer/CHOL | 50.7 ± 0.9 | 31.8 ± 7.8 | 14.9 ± 5.8 | 23.7 ± 3.3 | 55.2 ± 3.6 | 53.2 ± 2.8 | 9.0 ± 0.9 | 12.9 ± 4.7 | 31.9 ± 7.2  | 30.4 ± 4.9  |
| POPC/PSM/C18-sphingadiene-cer/CHOL       | 47.6 ± 3.3 | 29.2 ± 3.8 | 12.9 ± 3.4 | 22.1 ± 1.5 | 57.9 ± 2.2 | 54.2 ± 4.2 | 7.9 ± 0.5 | 12.9 ± 4.5 | 32.7 ± 47.2 | 27.7 ± 2.0  |

The bilayer composition was 60/15/15/10 (by mol) for the quaternary mixtures. Each value is the average of at least three independently repeated experiments (±SD).  $\tau$ , lifetime (ns);  $f$ , fractional intensity (%);  $\alpha$ , fractional amplitude (%);  $\tau_{AV}$ , intensity-weighted average lifetime (ns).
